# Supplementary material
Source: PubMed Central journal article supplement (PMC3648021)
Supplement: IAI.01401-12_zii999090105so1.pdf [file IAI.01401-12_zii999090105so1.pdf]

1 Fig S1.

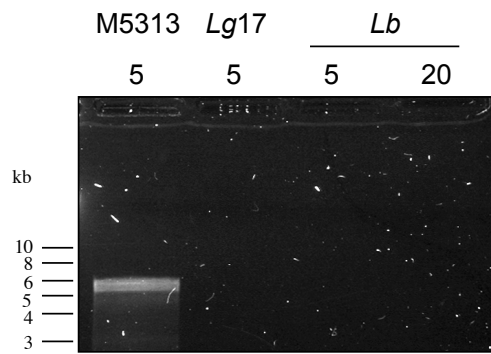

2

3 **Figure S1. *Leishmania* RNA virus is not detectable in the *L. braziliensis* BA-788**

4 **strain.** The *L. guyanensis* M5313 population and one of its derived clones *Lg17* were

5 used as positive and negative controls for LRV detection, respectively. Nucleic acid

6 extracts (5 and 20 µg as indicated) were digested with DNase I to allow visualization of

7 viral 5.3kb dsRNA genome and analyzed by electrophoresis on a 0.8% agarose gel.

8

9 Fig S2.

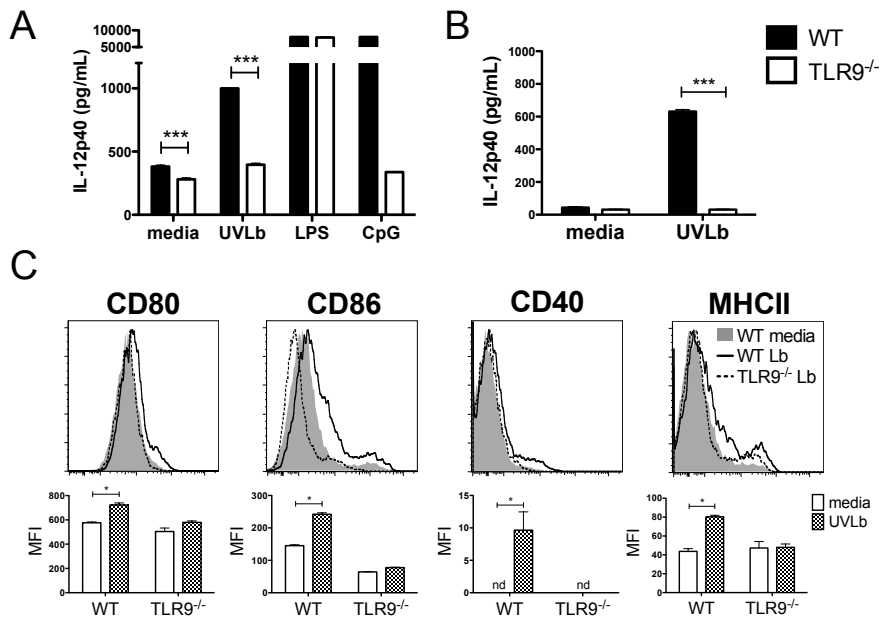

10

11 **Figure S2. IL-12p40 production and surface expression of costimulatory molecules**

12 **by pDCs in response to *L. braziliensis* is dependent on TLR9.** (A) WT and TLR9<sup>-/-</sup>

13 Flt3L-derived DCs were stimulated with or without UV-treated *L. braziliensis* parasites

14 (5:1), LPS or CpG for 24 hours. (B) FACS-sorted pDCs (CD11c<sup>+</sup> PDCA-1<sup>+</sup> F4/80<sup>-</sup>) were

15 stimulated with or without UV-treated *L. braziliensis* parasites (5:1) for 24 hours.

16 Supernatants were harvested and assessed for IL-12p40 production by ELISA.

17 Experiments were completed in triplicate and shown as the mean +SEM. \*\*\* p < 0.0005

18 by Student's *t*-test comparing TLR9<sup>-/-</sup> mice to control mice. Data shown here are results

19 from one representative experiment of at least 2 independent experiments. (C) WT and

20 TLR9<sup>-/-</sup> Flt3L-derived DCs were stimulated with or without UV-treated *L. braziliensis*

21 parasites (5:1) for 24 hours and subjected to flow cytometric analysis. Surface expression

22 of CD40, CD80, CD86 and MHCII was analyzed on CD11c<sup>+</sup> CD11b<sup>-</sup> B220<sup>+</sup> pDCs.

23 Representative histograms are shown with corresponding quantification calculating the  
24 mean MFI +SEM of triplicates from one representative experiment of at least 2  
25 independent experiments. For the histograms: basal WT expression (filled grey), WT  
26 stimulated by *L. braziliensis* (solid line) or TLR9<sup>-/-</sup> stimulated by *L. braziliensis* (dotted  
27 line). \*  $p < 0.05$  by Student's *t*-test comparing unstimulated DCs to *L. braziliensis*-  
28 stimulated DCs.  
29

30 Fig S3.

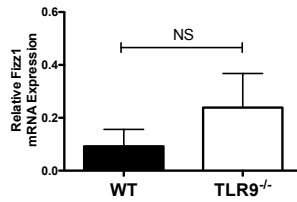

31

32 **Figure S3. *L. braziliensis*-infected mice do not exhibit differential Fizz1 expression.**

33 TLR9<sup>-/-</sup> and WT mice were infected in the footpad with *L. braziliensis* parasites.

34 Footpads were collected and real-time PCR was carried out for Fizz1 expression

35 normalized to HPRT. Results are presented as the mean +SEM (n = at least 5 mice per

36 group) from one representative experiment of at least 3 independent experiments. NS: not

37 statistically significant.

38

39

40

41

42
